# Supplementary material
Source: PubMed Central journal article supplement (PMC6404576)

**A**

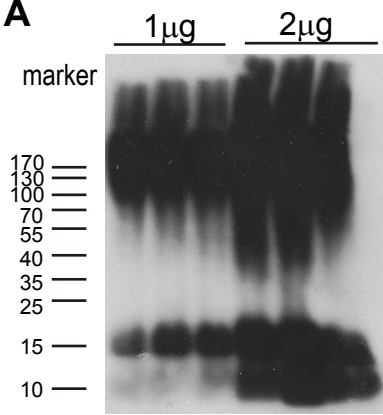

Supplement: fj.201801846R.sf1.pdf [file fj.201801846R.sf1.pdf]

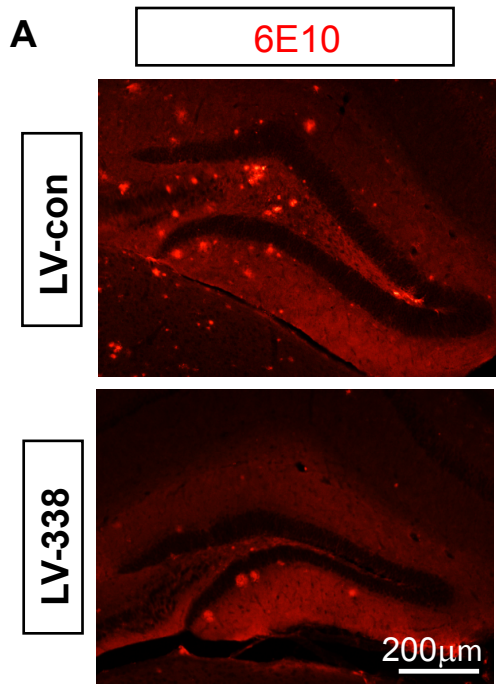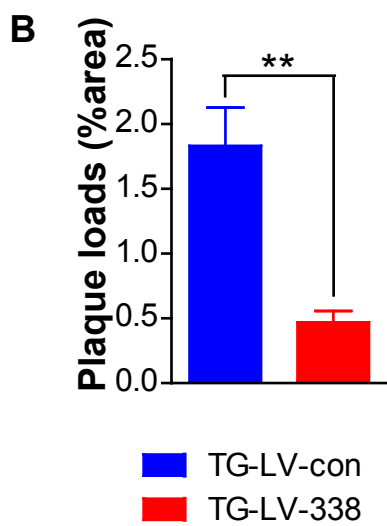

Supplement: fj.201801846R.sf2.pdf [file fj.201801846R.sf2.pdf]
